# Supplementary material for: Intermittent Ca2+ signals mediated by Orai1 regulate basal T cell motility
Source: eLife journal article supplement (doi:10.7554/elife.27827), 2017-12-14
Supplement: supp [file elife-27827-supp-v1.zip]

Archive with 9 entries (9 files):
- elife_poa_e27827_Video_3.mp4
- elife_poa_e27827_Video_1.avi
- elife_poa_e27827_Figure_1_figure_supplement_1.pdf
- elife_poa_e27827_Figure_5_figure_supplement_1.pdf
- elife_poa_e27827_Video_5.avi
- elife_poa_e27827_Video_4.avi
- elife_poa_e27827_Video_6.avi
- elife_poa_e27827_Transparent_Reporting_File.pdf
- elife_poa_e27827_Video_2.avi
