# Supplementary figures and images for: Intermittent Ca2+ signals mediated by Orai1 regulate basal T cell motility
Source: eLife journal article supplement (doi:10.7554/elife.27827), 2017-12-14

# Figure 1- figure supplement 1

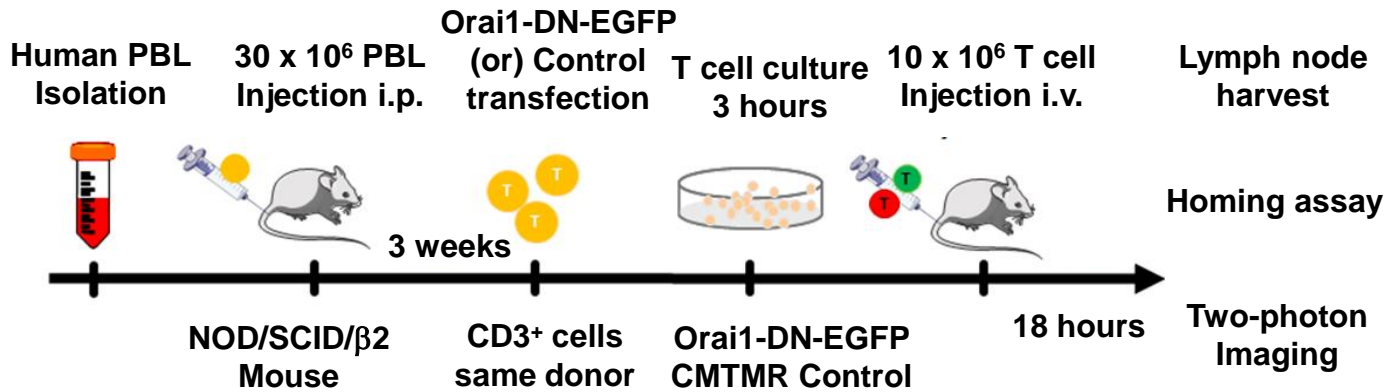

Supplement: supp [file elife-27827-supp-v1.zip]

Figure 5- Figure supplement 1

**A**

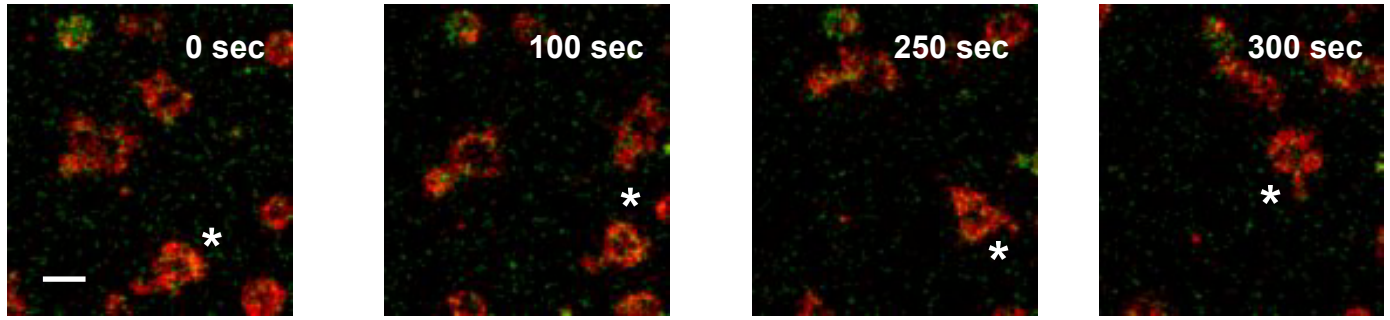

**B**

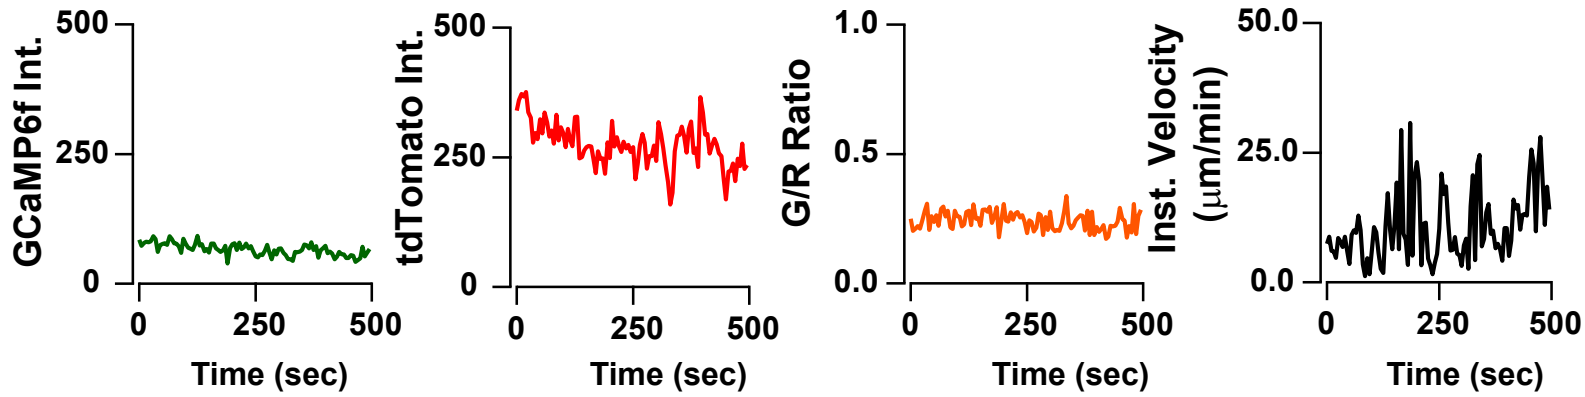

**C**

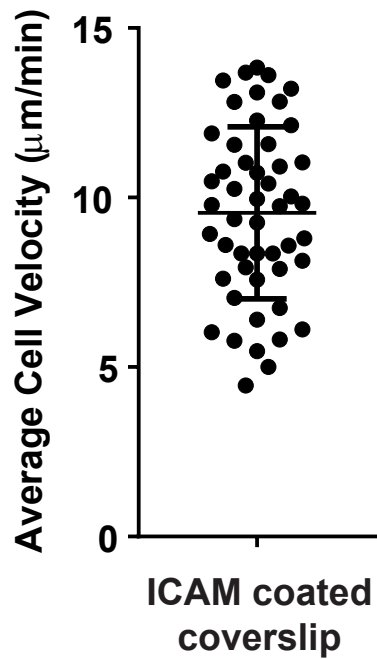

**D**

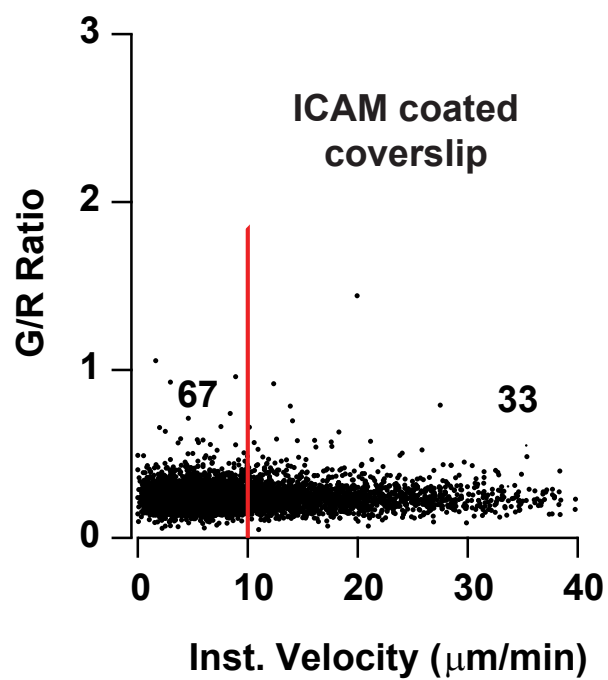

Supplement: supp [file elife-27827-supp-v1.zip › elife_poa_e27827_Figure_5_figure_supplement_1.pdf]
